# Supplementary material
Source: PubMed Central journal article supplement (PMC6340774)
Supplement: NIHMS1510363-supplement-1.pdf [file NIHMS1510363-supplement-1.pdf]

**Appendix**  
**Exposure to Child-Directed TV Advertising and Preschoolers' Intake of Advertised Cereals**  
**Emond et al.**

**Appendix Table 1.** Associations Between Exposure to Advertisements for Specific SBC Brands and Mean Intake of Those Brands<sup>a</sup>

| Independent variable                        | Outcome: Frequency of recent SBC intake <sup>b</sup> |                                       |                                                                  |
|---------------------------------------------|------------------------------------------------------|---------------------------------------|------------------------------------------------------------------|
|                                             | Model 1<br>Unadjusted                                | Model 2<br>Adjusted for<br>covariates | Model 3<br>Adjusted for<br>covariates and<br>baseline SBC intake |
|                                             | IRR (95 % CI)                                        | IRR (95 % CI)                         | IRR (95 % CI)                                                    |
| SBC advertisement exposure, brand-specific  |                                                      |                                       |                                                                  |
| No exposure                                 | 1.0 (ref)                                            | 1.0 (ref)                             | 1.0 (ref)                                                        |
| Recent (i.e., past 7-day) exposure only     | 1.13 (0.91, 1.39)                                    | 1.09 (0.89, 1.35)                     | 1.12 (0.91, 1.38)                                                |
| Past exposure only <sup>c</sup>             | <b>1.21 (1.04, 1.41)*</b>                            | 1.13 (0.97, 1.31)                     | 1.13 (0.98, 1.30)                                                |
| Recent (i.e., past 7-day) and past exposure | <b>1.35 (1.14, 1.60)**</b>                           | <b>1.26 (1.06, 1.49)*</b>             | <b>1.21 (1.03, 1.43)*</b>                                        |
| Usual intake of SBC brand at baseline       | –                                                    | –                                     | <b>4.46 (4.14, 4.81)**</b>                                       |

Notes: Boldface indicates statistical significance (\* $p < 0.05$ ; \*\* $p < 0.001$ ).

<sup>a</sup>Among 624 children enrolled in a prospective study.

<sup>b</sup>Number of times in the past 7 days each SBC was consumed (0, 1, 2, 3, 4, 5 or more). Each Poisson model included crossed random effects for child and SBC brand to account for the repeated measures and effects nested within brand, respectively. Each model was adjusted for time (i.e., follow-up assessment, continuous) and included both advertising exposures listed in the table. Model 2 is further adjusted for child age, sex, race/ethnicity, and WIC recipient status; parent education; children's other screen time (hours per week) at baseline and TV time (hours per week) at each study survey. Model 3 includes those same covariates plus usual intake of each advertised SBC brand at baseline.

<sup>c</sup>Past advertisement exposure based on any exposure at a previous follow-up assessment including baseline.

IRR, incidence risk ratio; SBC, sweetened, high-sugar breakfast cereal; WIC, Special Supplemental Nutrition Program for Women, Infants, and Children.
